# Supplementary material for: A Qualitative Transcriptional Signature for Predicting Prognosis and Response to Bevacizumab in Metastatic Colorectal Cancer
Source: Oxford University Press journal article supplement (doi:10.1158/1535-7163.mct-19-0864), 2020-05-05
Supplement: 15357163mct190864-sup-228653_2_supp_6055063_q68p17.xlsx [file 15357163mct190864-sup-228653_2_supp_6055063_q68p17.xlsx]

## Sheet: Sheet1
Table S1:Composition of the 64 gene pairs (64-GPS)
	gene1	gene2		gene1	gene2
pair1	ARID3A	PEX12	pair33	SERPINE1	STX17
pair2	ARID3A	WRN	pair34	SERPINE1	SRBD1
pair3	ARID3A	CHAF1B	pair35	SERPINE1	RTP4
pair4	ARID3A	EXO1	pair36	SERPINE1	RPAP3
pair5	ARID3A	ZBTB44	pair37	SERPINE1	PSRC1
pair6	ARID3A	DPP7	pair38	SERPINE1	LIN52
pair7	ARID3A	PLEKHA8P1	pair39	SERPINE1	LACTB
pair8	ARID3A	LSM8	pair40	SERPINE1	INAFM2
pair9	ARID3A	PHIP	pair41	SERPINE1	BAD
pair10	ARID3A	LRRC20	pair42	TIMP3	UGT8
pair11	ARID3A	DCLRE1B	pair43	TIMP3	PAXIP1
pair12	ARID3A	KRI1	pair44	TIMP3	FKBP11
pair13	ARID3A	C16orf59	pair45	TIMP3	FANCL
pair14	ARID3A	MTERF2	pair46	TIMP3	LSM2
pair15	ARID3A	EME1	pair47	TIMP3	GRHL2
pair16	ARID3A	ASH1L-AS1	pair48	TIMP3	AMMECR1L
pair17	ARID3A	NCK1-AS1	pair49	TIMP3	HAUS1
pair18	EDNRA	VAPA	pair50	TIMP3	ZFP62
pair19	EDNRA	CEP192	pair51	TIMP3	RBBP8
pair20	ITGA5	CD82	pair52	GPR116	SGMS1
pair21	ITGA5	TMEM59	pair53	GXYLT2	GAREM
pair22	ITGA5	FAM20B	pair54	LZTR1	TXNDC16
pair23	ITGA5	MESDC2	pair55	ASAP1	TXNDC16
pair24	ITGA5	COMMD4	pair56	SEMA3C	ASRGL1
pair25	ITGA5	KIAA1468	pair57	BTG1	BTBD3
pair26	ITGA5	AKTIP	pair58	EMP3	BTBD3
pair27	ITGA5	MPPE1	pair59	FAM127B	CPT2
pair28	ITGA5	ADPGK	pair60	IDS	RAB26
pair29	ITGA5	SLC30A7	pair61	GPR62	RAB26
pair30	ITGA5	ZBTB8A	pair62	MOGAT3	RAB26
pair31	SERPINE1	VAMP4	pair63	PALD1	CDC7
pair32	SERPINE1	FEM1B	pair64	MAP1B	OR7E14P
