# Supplementary material for: A Qualitative Transcriptional Signature for Predicting Prognosis and Response to Bevacizumab in Metastatic Colorectal Cancer
Source: Oxford University Press journal article supplement (doi:10.1158/1535-7163.mct-19-0864), 2020-05-05
Supplement: 15357163mct190864-sup-228653_2_supp_6055074_q68p17.xlsx [file 15357163mct190864-sup-228653_2_supp_6055074_q68p17.xlsx]

## Sheet: exp_bevacizumab
Table S3:Gene expression profile of genes in GPS-64
Gene_id	HCF1.mat	HCF2.mat	HCF3.mat	LGL1.mat	LGL2.mat	LGL3.mat	SDL1.mat	SDL2.mat	WCY1.mat	WCY2.mat	WCY3.mat	ZCH1.mat	ZCH3.mat
ARID3A	3.85235	4.86932	4.58096	2.32087	2.10543	2.37544	24.2872	20.3371	11.236	8.61973	9.70717	7.27113	6.44409
EDNRA	2.25242	1.30641	0.50726	2.1561	2.14618	1.11738	5.99637	10.7982	2.35681	10.9543	6.96604	6.31892	10.8798
ITGA5	6.6819	4.14694	1.8844	12.1738	14.3638	13.234	17.7552	46.5011	11.4132	57.8447	55.9004	39.1321	66.5883
SERPINE1	1.91524	1.26315	0.507943	10.8921	5.46013	13.219	14.815	30.4424	7.35405	45.3841	38.3204	23.4214	45.4413
TIMP3	18.7422	17.1717	7.08644	29.7351	30.269	19.9136	24.7882	34.9325	32.8281	154.793	110.145	116.232	132.945
GXYLT2	3.30905	3.73166	4.00819	0.716639	1.56877	0.396694	0.97219	1.33105	0.734352	9.94941	2.11453	2.27932	5.90339
LZTR1	8.01425	10.3833	8.87418	20.0244	19.9932	23.4784	16.2629	19.3251	15.2213	18.4314	23.3577	17.7356	15.964
ASAP1	6.17441	3.81104	2.46529	5.7573	5.91281	6.01389	20.7442	20.8349	8.44961	12.4479	12.6571	17.2053	22.1709
SEMA3C	20.1647	20.3071	22.6139	14.6988	11.8659	7.92482	17.8616	16.7362	29.9283	22.655	15.0317	20.9487	18.7654
BTG1	53.0411	44.9449	42.034	26.5619	24.2136	25.0184	28.0623	36.8576	71.2187	64.3421	55.9198	54.4449	49.7534
EMP3	8.43869	7.80111	4.3212	12.6756	21.1205	12.0862	20.3928	24.8347	12.9563	40.5366	38.0041	24.4597	57.3326
IDS	23.1994	16.3849	23.0914	14.7719	20.2261	14.2961	12.3572	24.3041	18.8064	31.2237	28.294	21.6229	44.3271
GPR62	0	0.076278	0	0.022834	0.050953	0.02716	0.022698	0.023552	0.05864	0.068764	0.008351	0	0
MOGAT3	11.4794	8.40468	12.516	10.4472	4.8182	6.4465	6.26437	5.50497	24.8996	12.5272	23.104	7.14806	3.684
PALD1	9.9037	13.5642	14.6505	8.24466	10.2415	8.34086	7.2527	9.89779	2.39173	6.88027	7.98738	7.68385	10.346
MAP1B	0.926271	1.21334	0.353834	1.02597	1.12485	1.45164	2.29706	5.34752	1.91857	6.46678	8.56312	3.53093	5.29402
PEX12	1.13551	1.71409	1.06195	0.876259	0.845228	0.739266	1.59318	1.86854	2.66723	2.54235	3.01488	1.48663	2.38974
WRN	2.57399	2.41617	2.58005	3.28437	2.74545	4.00911	3.90026	4.06731	4.35738	3.66979	4.13428	3.16344	2.85061
CHAF1B	2.56259	2.29667	2.71967	6.29448	6.34886	6.18806	3.33725	3.11486	2.26441	1.71717	2.40994	1.71673	2.13175
EXO1	6.40508	2.85084	3.91155	10.131	14.3582	14.3083	4.1118	3.17213	4.2742	1.98128	2.42329	3.32317	2.25448
ZBTB44	8.22727	7.15264	7.23879	6.98668	7.41949	7.92496	7.06646	6.79937	10.3256	6.12269	5.79552	6.20598	5.86374
DPP7	68.7833	97.8619	73.4665	107.738	90.2793	116.277	121.841	107.149	22.871	63.5587	58.8421	80.9359	104.729
PHIP	11.0348	8.99054	11.4413	7.18645	8.66762	8.79686	11.6744	12.4613	10.4177	8.52972	11.6705	9.16006	8.45458
LRRC20	1.54626	2.89606	5.69485	3.31424	3.41026	4.6598	6.04563	1.95984	6.54107	4.35306	5.28589	3.60747	4.75234
DCLRE1B	3.71376	3.45171	3.72787	6.27277	9.15516	8.87987	4.03505	3.50993	3.06838	2.94599	2.79956	3.2841	3.22183
KRI1	16.8642	21.1504	20.5356	14.4991	15.5118	19.9954	32.4082	31.0414	11.2286	12.8127	18.7783	10.5775	12.3672
EME1	0.993698	0.978859	0.953957	2.48114	2.46341	3.19835	4.67355	4.20926	2.89083	1.70933	3.64567	1.42107	1.19923
VAPA	12.8888	14.1062	14.5392	24.1058	25.1123	24.1129	34.0497	35.1604	27.7109	23.8024	23.8964	20.7781	19.1173
CEP192	4.8658	2.60645	3.12006	4.84137	5.69295	5.54699	9.62085	9.36292	8.40183	4.20999	4.98162	5.37873	3.68739
CD82	30.2523	31.2278	24.2302	56.0963	53.3316	35.8617	20.4164	22.1787	57.6783	44.7624	38.6878	30.9244	35.7412
TMEM59	154.808	179.688	158.167	90.3571	77.4569	56.0026	70.6999	74.3774	145.335	110.409	108.075	137.187	82.9009
FAM20B	12.6315	10.7911	10.9219	8.68632	10.4414	10.6004	10.1129	10.7853	8.02184	9.45554	9.29534	8.28876	8.6196
COMMD4	14.3537	18.2753	15.4035	56.6889	46.5712	48.3172	24.1393	21.12	27.3718	27.7412	33.73	30.4888	25.9087
AKTIP	10.3939	13.0679	11.9641	6.92981	7.28749	6.02917	4.50463	7.94124	9.65265	12.1886	13.2946	10.8101	10.1887
MPPE1	6.30874	4.86803	5.58703	7.84439	6.30207	6.12983	7.442	10.9742	17.6544	9.0311	13.5341	8.81991	8.37203
ADPGK	17.2476	16.0949	16.4909	30.49	25.4885	28.5502	11.6722	12.9366	13.4829	17.7866	19.1251	14.9232	18.5393
SLC30A7	9.23158	7.65724	8.99187	8.2895	8.36101	8.02516	7.06261	9.15488	8.84174	6.50138	6.06297	9.61391	8.61626
ZBTB8A	1.84895	1.946	1.93403	1.70376	2.04149	1.95869	1.34946	1.90047	1.16804	1.97955	2.10911	1.35119	2.00752
VAMP4	3.80924	2.39963	3.19781	2.5893	2.65128	1.34294	3.53004	4.96837	3.67334	4.66709	4.95458	4.45095	5.22566
FEM1B	12.8703	10.9249	12.1025	11.0539	11.9646	10.8688	7.11551	8.04787	10.1354	11.9663	10.9012	12.0413	12.7419
STX17	9.92562	7.57311	9.62325	10.7231	9.13721	9.43404	9.9297	10.8274	8.75252	7.80838	9.76568	12.5561	9.31845
SRBD1	6.33726	6.18675	7.53814	7.79123	8.87231	7.3247	4.49353	4.04027	5.77458	4.03816	5.51098	5.67366	3.93858
RTP4	2.90031	3.94713	2.90439	6.05402	6.64059	6.68345	4.35531	3.47927	7.55507	8.51583	14.884	6.22067	5.22069
RPAP3	16.379	15.1973	19.0004	15.4735	13.6768	12.9132	18.6154	16.6845	10.4964	10.7474	11.7723	10.8722	12.7992
PSRC1	7.23504	8.32014	6.32949	10.5756	13.5655	9.4118	6.22251	7.5755	4.39952	5.34239	4.77789	5.14657	5.26338
LIN52	3.80807	3.79151	4.47822	7.83177	9.14467	9.04948	4.52057	4.34645	2.55022	3.9741	4.86194	2.61324	2.54872
LACTB	13.9039	13.7795	13.9124	9.72733	9.74048	9.2234	8.65221	7.96465	7.51522	10.1172	8.95067	12.2254	13.5438
BAD	33.7204	38.4714	24.6129	30.8265	23.2284	23.5183	29.9581	24.7325	31.6514	28.5927	31.5745	21.3449	26.1679
UGT8	12.0252	12.9453	12.2196	17.3547	16.5751	15.639	50.3415	46.9533	15.6603	5.3141	5.66847	13.9313	8.5282
PAXIP1	8.93905	8.19164	9.63744	14.6667	12.0316	14.0176	11.7187	11.4848	9.10855	6.2847	8.11904	7.57027	6.20263
FKBP11	20.5282	19.4715	15.0768	58.8371	41.6413	51.2162	32.9344	35.6471	35.8176	36.762	27.3306	38.7901	34.5842
FANCL	10.008	11.1207	9.96947	12.2504	14.641	11.564	17.3304	19.7997	10.4913	9.69531	14.1833	10.8372	11.7829
LSM2	27.1158	31.4661	33.6893	34.7157	38.0532	43.6487	32.4421	29.4073	24.0589	28.3498	29.209	25.9023	30.89
GRHL2	13.4578	13.7203	14.8377	10.0304	9.40835	13.0888	21.9036	18.039	13.0373	6.60429	8.83091	12.0011	8.40937
AMMECR1L	10.0226	9.06645	9.78371	7.40268	7.97509	8.1422	9.31972	9.95539	5.85688	6.85403	8.29861	8.58527	8.76993
HAUS1	8.81036	8.95797	8.86246	20.259	19.0985	20.9525	8.34905	11.1611	10.324	11.1655	11.2936	12.0405	13.6531
ZFP62	18.0757	18.6777	20.6519	19.9406	18.9868	21.3342	6.69605	11.3338	17.9816	10.9602	12.1898	15.1819	13.6202
RBBP8	8.08986	9.06865	9.86715	19.1048	19.8516	16.7462	12.7017	10.8562	10.7803	9.37574	9.88859	9.87056	7.22359
SGMS1	7.52719	5.40505	5.85395	7.13812	6.43781	5.95815	19.32	16.3522	13.0793	7.49651	8.23425	6.89436	6.40728
TXNDC16	5.91369	4.71718	4.29014	1.91674	2.33341	2.23153	3.84369	2.72595	3.77952	3.1297	2.88809	3.24686	2.85225
ASRGL1	5.3021	2.68926	5.20605	18.3479	17.7246	14.5907	25.8034	17.2369	8.81792	3.54163	4.79217	9.32436	4.50399
BTBD3	5.74139	4.33446	5.47468	3.6137	2.44545	1.47942	4.07368	2.87344	6.1078	5.22729	4.47697	3.32966	2.53636
CPT2	16.0325	14.6418	15.189	15.5728	11.7934	10.1424	10.5634	10.094	17.4793	9.49474	9.28682	13.6137	8.41994
RAB26	3.58778	1.50668	1.34857	1.36445	0.694756	0.712701	0.477634	0.761561	3.36164	0.96275	1.63523	2.32088	0.94806
CDC7	4.50755	4.32259	5.79045	6.34932	7.68379	9.29966	9.69356	10.1336	5.28587	4.35292	7.41621	4.49511	4.59067
